# Supplementary material for: Morbidity and Mortality Rates Following Cytoreductive Surgery Combined With Hyperthermic Intraperitoneal Chemotherapy Compared With Other High-Risk Surgical Oncology Procedures
Source: PubMed Central journal article supplement (PMC6484874; doi:10.1001/jamanetworkopen.2018.6847), 2019-01-11
Supplement: jamanetwopen-2-e186847-s001.pdf [file jamanetwopen-2-e186847-s001.pdf]

## Supplementary Online Content

Foster JM, Sleightholm R, Patel A, et al. Morbidity and mortality rates following cytoreductive surgery combined with hyperthermic intraperitoneal chemotherapy compared with other high-risk surgical oncology procedures. *JAMA Netw Open*. 2019;2(1):e186847.  
doi:10.1001/jamanetworkopen.2018.6847

**eFigure 1.** Age Distribution for Each Treatment

**eFigure 2.** Length of Stay Duration for Each Treatment

**eTable 1.** CPT Codes Utilized

**eTable 2.** Frequency of Multiple CPT Codes

**eTable 3.** Rates of Comorbidities

This supplementary material has been provided by the authors to give readers additional information about their work.

eFigure 1

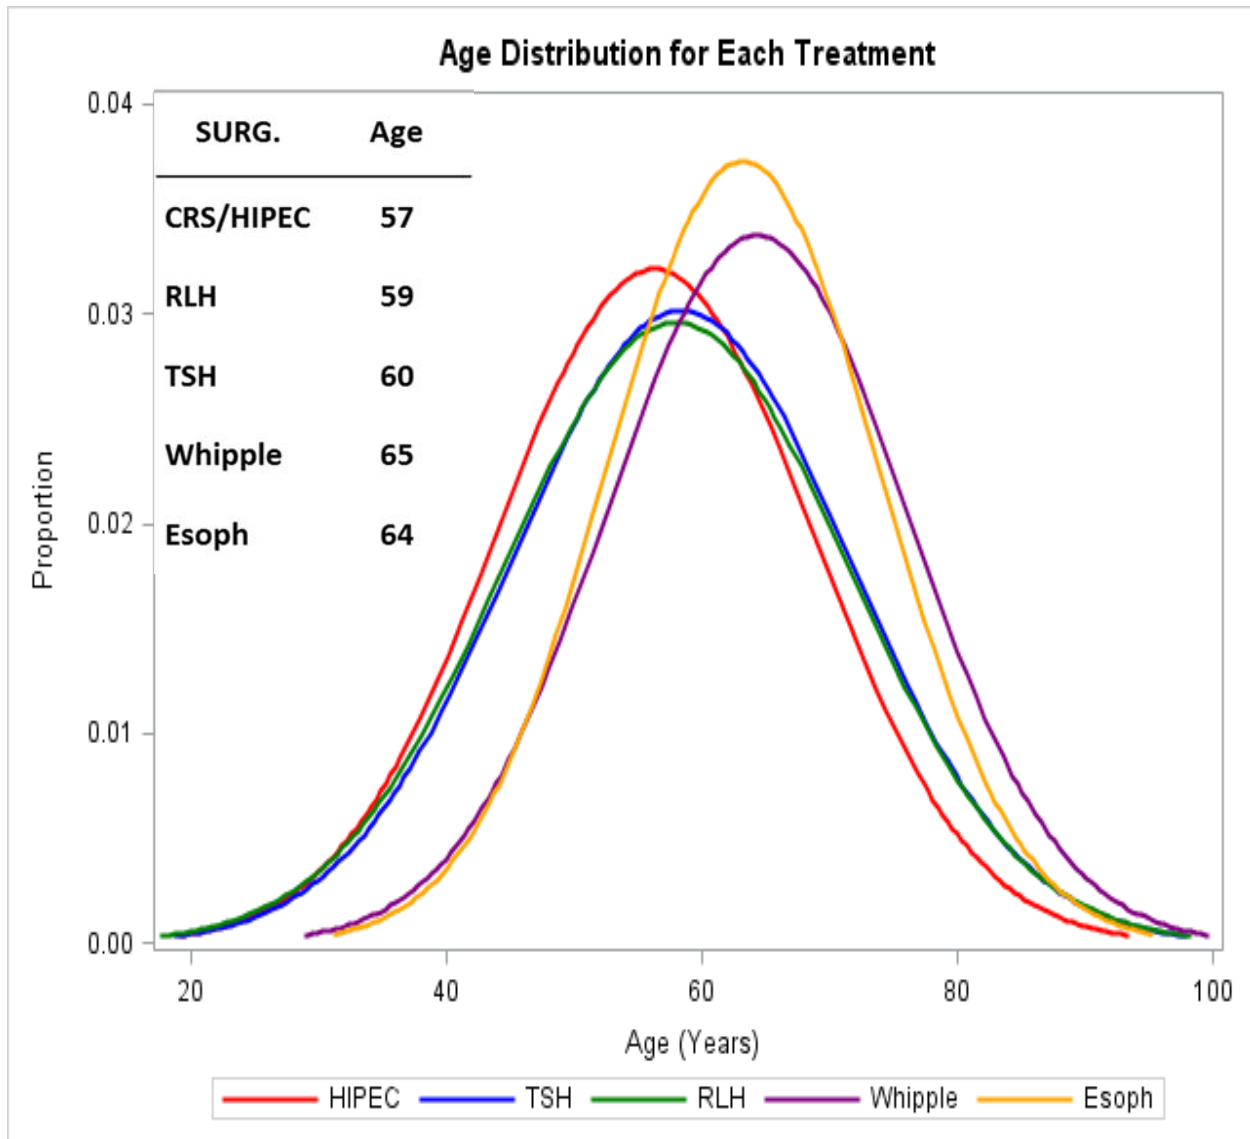

**eFigure 2**

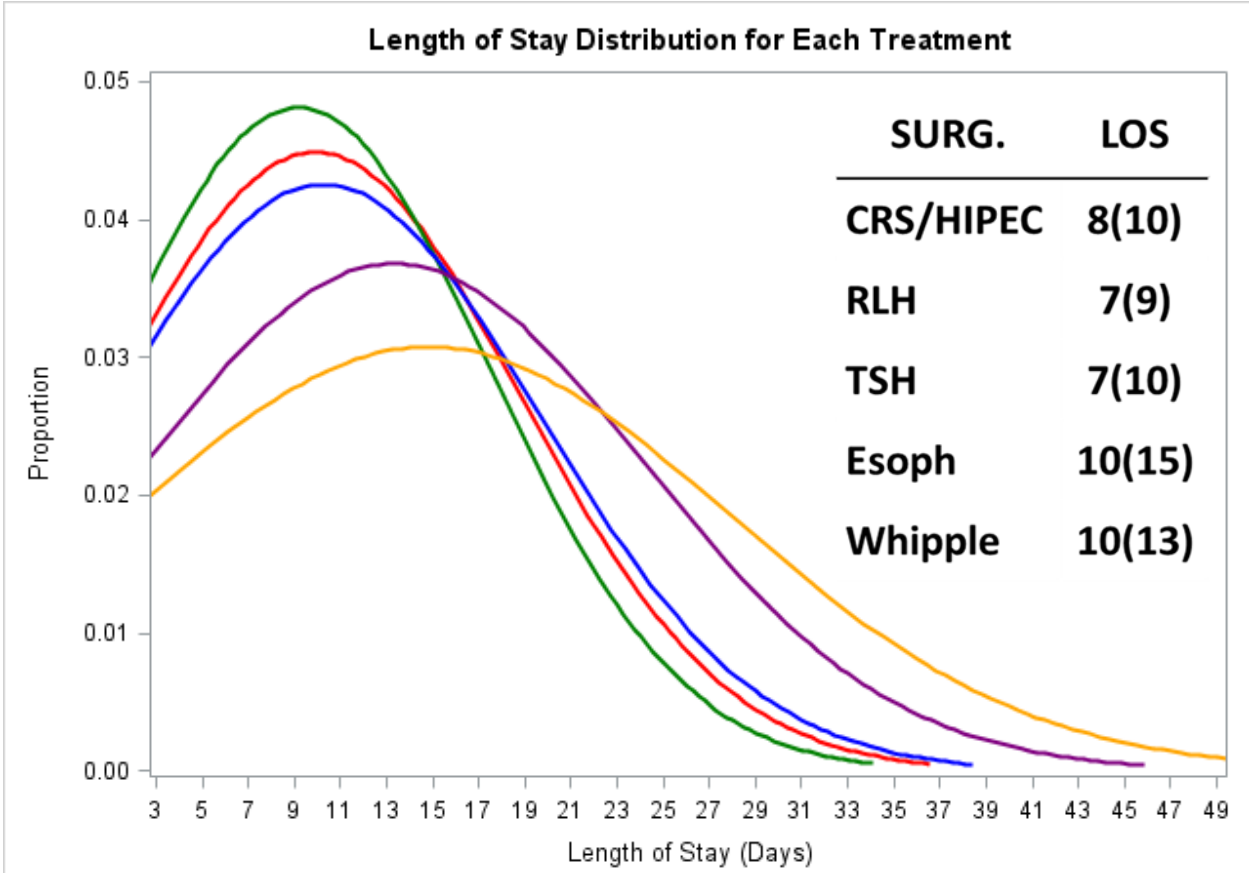

**eTable 1 CPT Codes utilized**

| <b><u>cpt CODES</u></b>    |           |            |            |
|----------------------------|-----------|------------|------------|
| Tumor resection            | 49205     | 203        | 11%        |
|                            | 49204     | 75         | 4%         |
|                            | 49203     | 265        | 15%        |
| <b>TOTAL</b>               |           | <b>543</b> | <b>30%</b> |
|                            |           |            |            |
| Small or Large intestine   | 44150     | 26         | 1%         |
|                            | 44140     | 204        | 11%        |
|                            | 44145     | 37         | 2%         |
|                            | 44160     | 128        | 7%         |
|                            | 44120     | 176        | 10%        |
| <b>TOTAL</b>               |           | <b>571</b> | <b>31%</b> |
|                            |           |            |            |
| <b>Other GI resections</b> |           |            |            |
| Distal panc                | 48140     | 66         | 4%         |
| Splenectomy                | 38100     | 82         | 5%         |
| Choly                      | 47600     | 327        | 18%        |
|                            | 58180     | 31         | 2%         |
| <b>TOTAL</b>               |           | <b>506</b> | <b>28%</b> |
|                            |           |            |            |
| Other cpt codes            | see below | 1178       | 65%        |

Other cpt codes: 49180, 49185, 49215, 49220, 49250, 49255, 58953, 58954, 58720, 58150

**eTable 2 Frequency of multiple CPT codes**

| # of codes | Frequency | Percent | Cumulative<br>Frequency | Cumulative<br>Percent |
|------------|-----------|---------|-------------------------|-----------------------|
| 0          | 441       | 24.2    | 471                     | 24.2                  |
| 1          | 551       | 30.22   | 1059                    | 54.42                 |
| 2          | 419       | 23.02   | 1507                    | 77.44                 |
| 3          | 257       | 14.13   | 1782                    | 91.57                 |
| 4          | 107       | 5.86    | 1896                    | 97.43                 |
| 5          | 39        | 2.16    | 1938                    | 99.59                 |
| 6          | 7         | 0.41    | 1822                    | 100                   |

**eTable 3. Rates of Comorbidities**

| Treatment     | Age | smoke     | dyspnea   | diabetes  | wtloss    | ascites  | hxchf |
|---------------|-----|-----------|-----------|-----------|-----------|----------|-------|
|               |     |           |           |           |           |          |       |
| CRS/HIPEC     | 57  | 11.8%     | 6.7%      | 10.4%     | 5.6%      | 16.1%    | 0.4%  |
| RLH           | 59  | 15.3%***  | 6.1%      | 15.6%***  | 5.1%      | 0.9%**** | 0.2%  |
| TSH           | 60  | 16.1%**** | 6.7%      | 13.8%***  | 7.9%      | 1.3%**** | 0.3%  |
| Whipple       | 65  | 20.7%**** | 6.8%      | 25.3%**   | 17.5%**** | 0.5%**** | 0.4%  |
| Esophagectomy | 64  | 25.3%**** | 10.4%**** | 16.6%**** | 19.6%**** | 0.2%**** | 0.3%  |
| * P<0.05      |     |           |           |           |           |          |       |
| **P<0.01      |     |           |           |           |           |          |       |
| ***P<0.001    |     |           |           |           |           |          |       |
| ****P<0.0001  |     |           |           |           |           |          |       |
